# Supplementary material for: Potential health effects of brewers’ spent grain as a functional food ingredient assessed by markers of oxidative stress and inflammation following gastro-intestinal digestion and in a cell model of the small intestine
Source: Royal Society of Chemistry journal article supplement (doi:10.1039/d1fo03090f), 2022-01-01
Supplement: d1fo03090f1.pdf [file d1fo03090f1.pdf]

1

2 **OSM tables and figures**

3

4 **Supplementary Table 1.** Pairwise correlations of investigated parameters before and after simulated  
5 gastro-intestinal digestion, showing Pearson correlation coefficients.

6

| Before digestion |                 |                  |            |            | After digestion |                  |            |            |               |
|------------------|-----------------|------------------|------------|------------|-----------------|------------------|------------|------------|---------------|
|                  | Total Phenolics | Total Flavonoids | Total ABTS | Total FRAP | Total Phenolics | Total Flavonoids | Total ABTS | Total FRAP | Dietary Fiber |
| Total Phenolics  | 1               |                  |            |            | 1               |                  |            |            |               |
| Total Flavonoids | 0.788*          | 1                |            |            | 0.647*          | 1                |            |            |               |
| Total ABTS       | 0.777*          | 0.680*           | 1          |            | 0.746*          | 0.688*           | 1          |            |               |
| Total FRAP       | 0.885*          | 0.769*           | 0.894*     | 1          | 0.830*          | 0.721*           | 0.724*     | 1          |               |
| Dietary Fiber    | n.a             | n.a.             | n.a.       | n.a.       | 0.570*          | 0.742*           | 0.772*     | 0.741*     | 1             |

7 \*correlation is significant at the 0.05 level (2-tailed)\*, 0.01\*\* and 0.001\* level.

8

9

10

11

12

13

14

15

16

17

18

19  
20

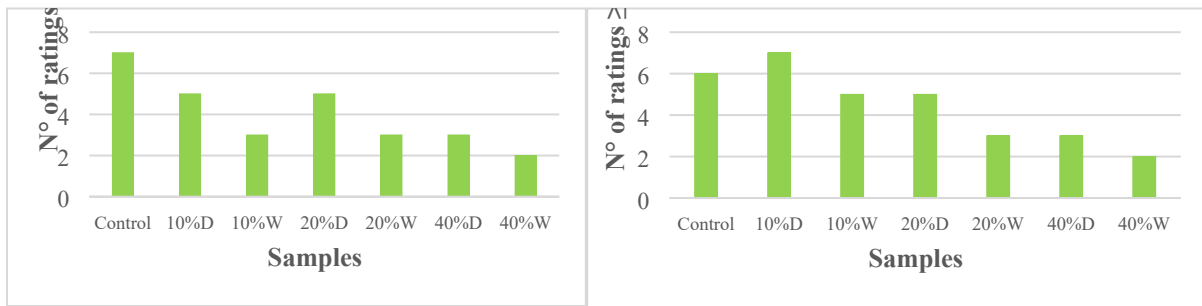

21

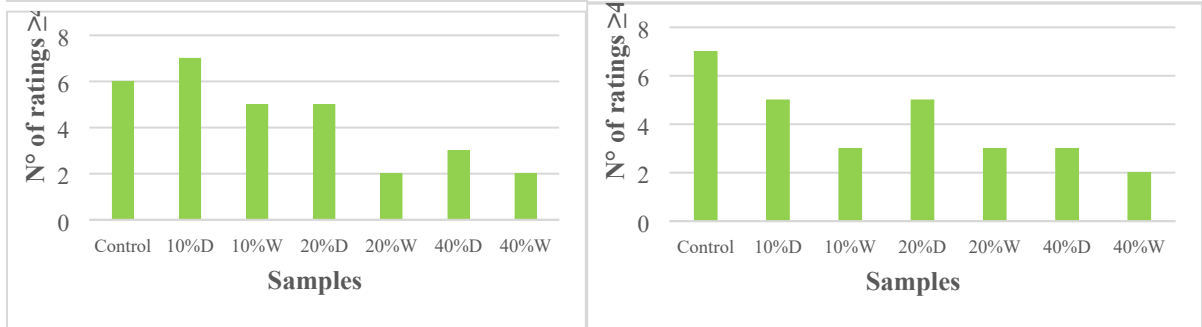

22

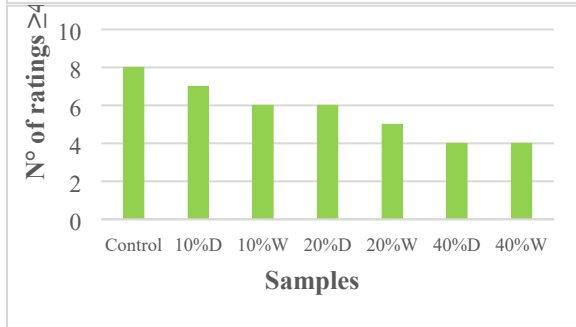

23

24

25

26 **Supplementary Figure 1.** Home-baked bread samples were subject to a limited sensory evaluation (n  
27 = 10) based on a self-administered questionnaire. The evaluation addressed the characteristics of the  
28 home-baked samples, namely Tasting (A), Texture (B), Visual Appearance (C), Smell (D) and  
29 Commercial Acceptance (E) with a Likert scale question for each characteristic from 1 being very bad  
30 to 5 being very good. The evaluation of each sample was recorded separately for each participant. The  
31 results are reported as the frequency of each individual sample of the home-baked bread receiving either  
32 a good or very good evaluation (4 or 5 on the Likert scale, respectively) from the participants. It should  
33 be noted that only 7 samples, 10% D, 20% D, 40% D, 10% W, 20% W, 40% W and 0% BSG control  
34 bread were included in the survey as bread samples with higher BSG concentrations crumbled,  
35 fragmented and were difficult to handle by the participants.

36

37

38

39

40

41

42

43

44

45

46  
47

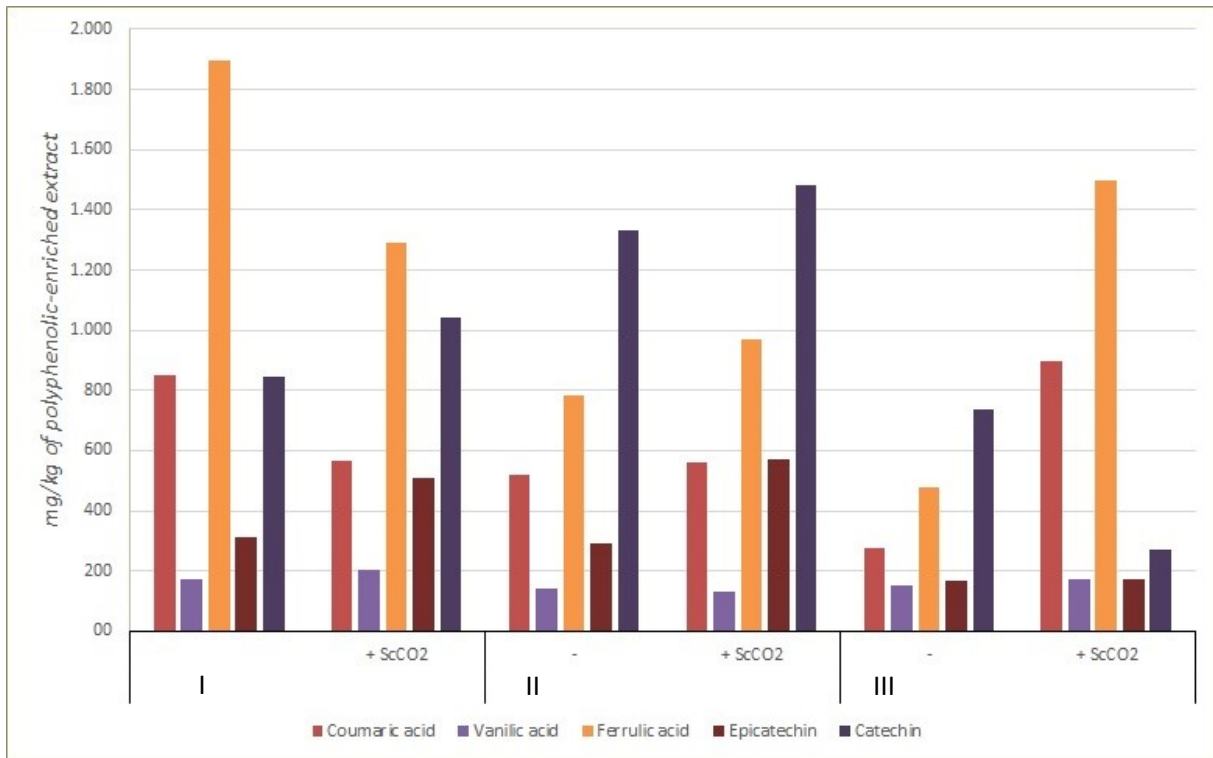

48  
49  
50  
51  
52  
53  
54  
55  
56

**Supplementary Figure 2.** Analyses of main individual polyphenols in the 3 (I, II, II) analysed BSG varieties using UPLC-TQ-MS analysis. More explanations are given in materials and methods. ScCO2= with supercritical CO<sub>2</sub> treatment.

57  
58  
59  
60  
61  
62  
63  
64

65

66

67

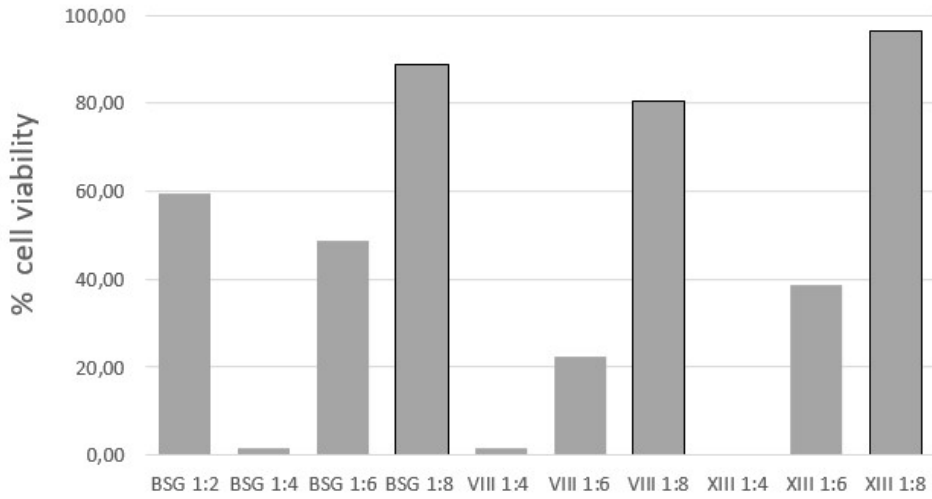

68

69

70 **Supplementary Figure 3.** Dilution tests for the determination of the appropriate dilution factor  
71 according to cell viability, expressed in % compared to media exposed cells. Samples tested were BSG  
72 II, bread VIII (10% BSG content) and bread XIII (100% BSG content). N=2 per sample.

73

74

75

76

77

78

79

80
